# Supplementary material
Source: PubMed Central journal article supplement (PMC3937772)
Supplement: supp_127.5.1018_JCS138776.pdf [file supp_127.5.1018_JCS138776.pdf]

## Supplemental Figure Legends

**Supplemental Figure 1. RAB26 does not localize to the immature secretory vesicle, endosomal, Golgi, or post-Golgi sorting compartments.** EGFP-RAB26 (green) transfected HGC-27 cells immunostained for: **A.** immature secretory vesicle marker, Furin (red); **B.** endoplasmic reticulum marker, Calregulin (red); **C.** early endosomal marker, EEA1 (red); **D.** Golgi marker, Giantin (red); **E.** *cis*-Golgi marker, GM130 (red); **F.** *trans*-Golgi marker, TGN46 (red); and **G.** post-Golgi/late endosome marker, CI-M6PR (red). Confocal microscopy of EGFP-RAB26 (green) transfected HGC-27 cells immunostained for post-Golgi/endosomal markers: **B.** CI-M6PR (red) **C.** AP1 (red), **D.** GGA2 (red). Insets indicate RAB26 vesicles (white filled arrowheads) overlap with stained markers (open arrowheads) (Cell border outlined, “N” – nucleus). Scale bars = 20  $\mu$ m.

**Supplemental Figure 2. RAB26 not RAB3D localizes to lysosomes.** **A.** Immunofluorescence microscopy of HGC-27 cells transfected with EGFP-RAB3D and co-stained for LAMP1 (red) and cathepsin D (purple). Epifluorescence images of EGFP-RAB26 transfected: **B.** AGS, gastric cells; **C.** 5637, bladder cells; and **D.** AR42J, pancreatic cells co-labeled for LAMP1 (red). Panels indicate unmerged green and red channels. **E.** Confocal microscopy of an AR42J cell transfected with EGFP-RAB26 and immunostained for LAMP1 (red). Arrowheads indicate areas of overlap (Cell border outlined, “N” – nucleus). Scale bars = 20  $\mu$ m unless indicated.

**Supplemental Figure 3. RAB26 does not affect Golgi or late endosomal distribution.** Fluorescence microscopy of EGFP-RAB26, EGFP-RAB26T77N, EGFP-RAB26Q123L, and EGFP transfected HGC-27 cells (green) co-stained for: **A.** giantin (red) and **B.** CI-M6PR (red). Low magnification panels of EGFP-RAB26 transfected cells highlight giantin and CI-M6PR distribution in transfected (green) and untransfected cells. Scale bars = 20  $\mu$ m.

**Supplemental Figure 4. RAB26 does not affect lysosomal or mitochondrial function.** **A.** Western blots (triplicate experiments) of EGFP-RAB26, EGFP-RAB26T77N, EGFP-RAB26Q123L, and EGFP transfected HGC-27 cells comparing levels of LAMP1, cathepsin D, mTOR, phosphorylated S6 kinase, total S6 kinase, and tubulin. **B.** Fluorescence microscopy of

EGFP-RAB26, EGFP-RAB26T77N, EGFP-RAB26Q123L, and EGFP transfected HGC-27 cells (green) co-stained for: **B.** MitoTracker CMXRos (red) and **C.** MitoSOX Red (red) and MitoTracker Deep Red (purple). Scale bars = 20  $\mu\text{m}$ .

**Movie 1. RAB26 does not colocalize with secretory vesicles.** Live confocal timelapse microscopy of HGC-27 cells transfected with EGFP-RAB26 (green) and PGC-RFP (red). Images were taken at 3 second intervals and movie is displayed at 5 frames/second. White arrows highlight RAB26 vesicle movement. Yellow arrows and circles show vesicle fusion or fission events. Time stamp is shown in upper left corner and scale bar = 20  $\mu\text{m}$ .

**Movie 2. RAB26 localizes with lysosomes in mitochondrial free subcellular areas.** Live confocal timelapse microscopy of HGC-27 cells transfected with EGFP-RAB26 (green) stained for lysosomes (LysoTracker, red) and mitochondria (MitoTracker Deep Red, Blue). Images were taken at 40 second intervals and movie is displayed at 3 frames/second. White arrows highlight RAB26/LysoTracker vesicle movement. Time stamp is shown in upper left corner and scale bar = 20  $\mu\text{m}$ .

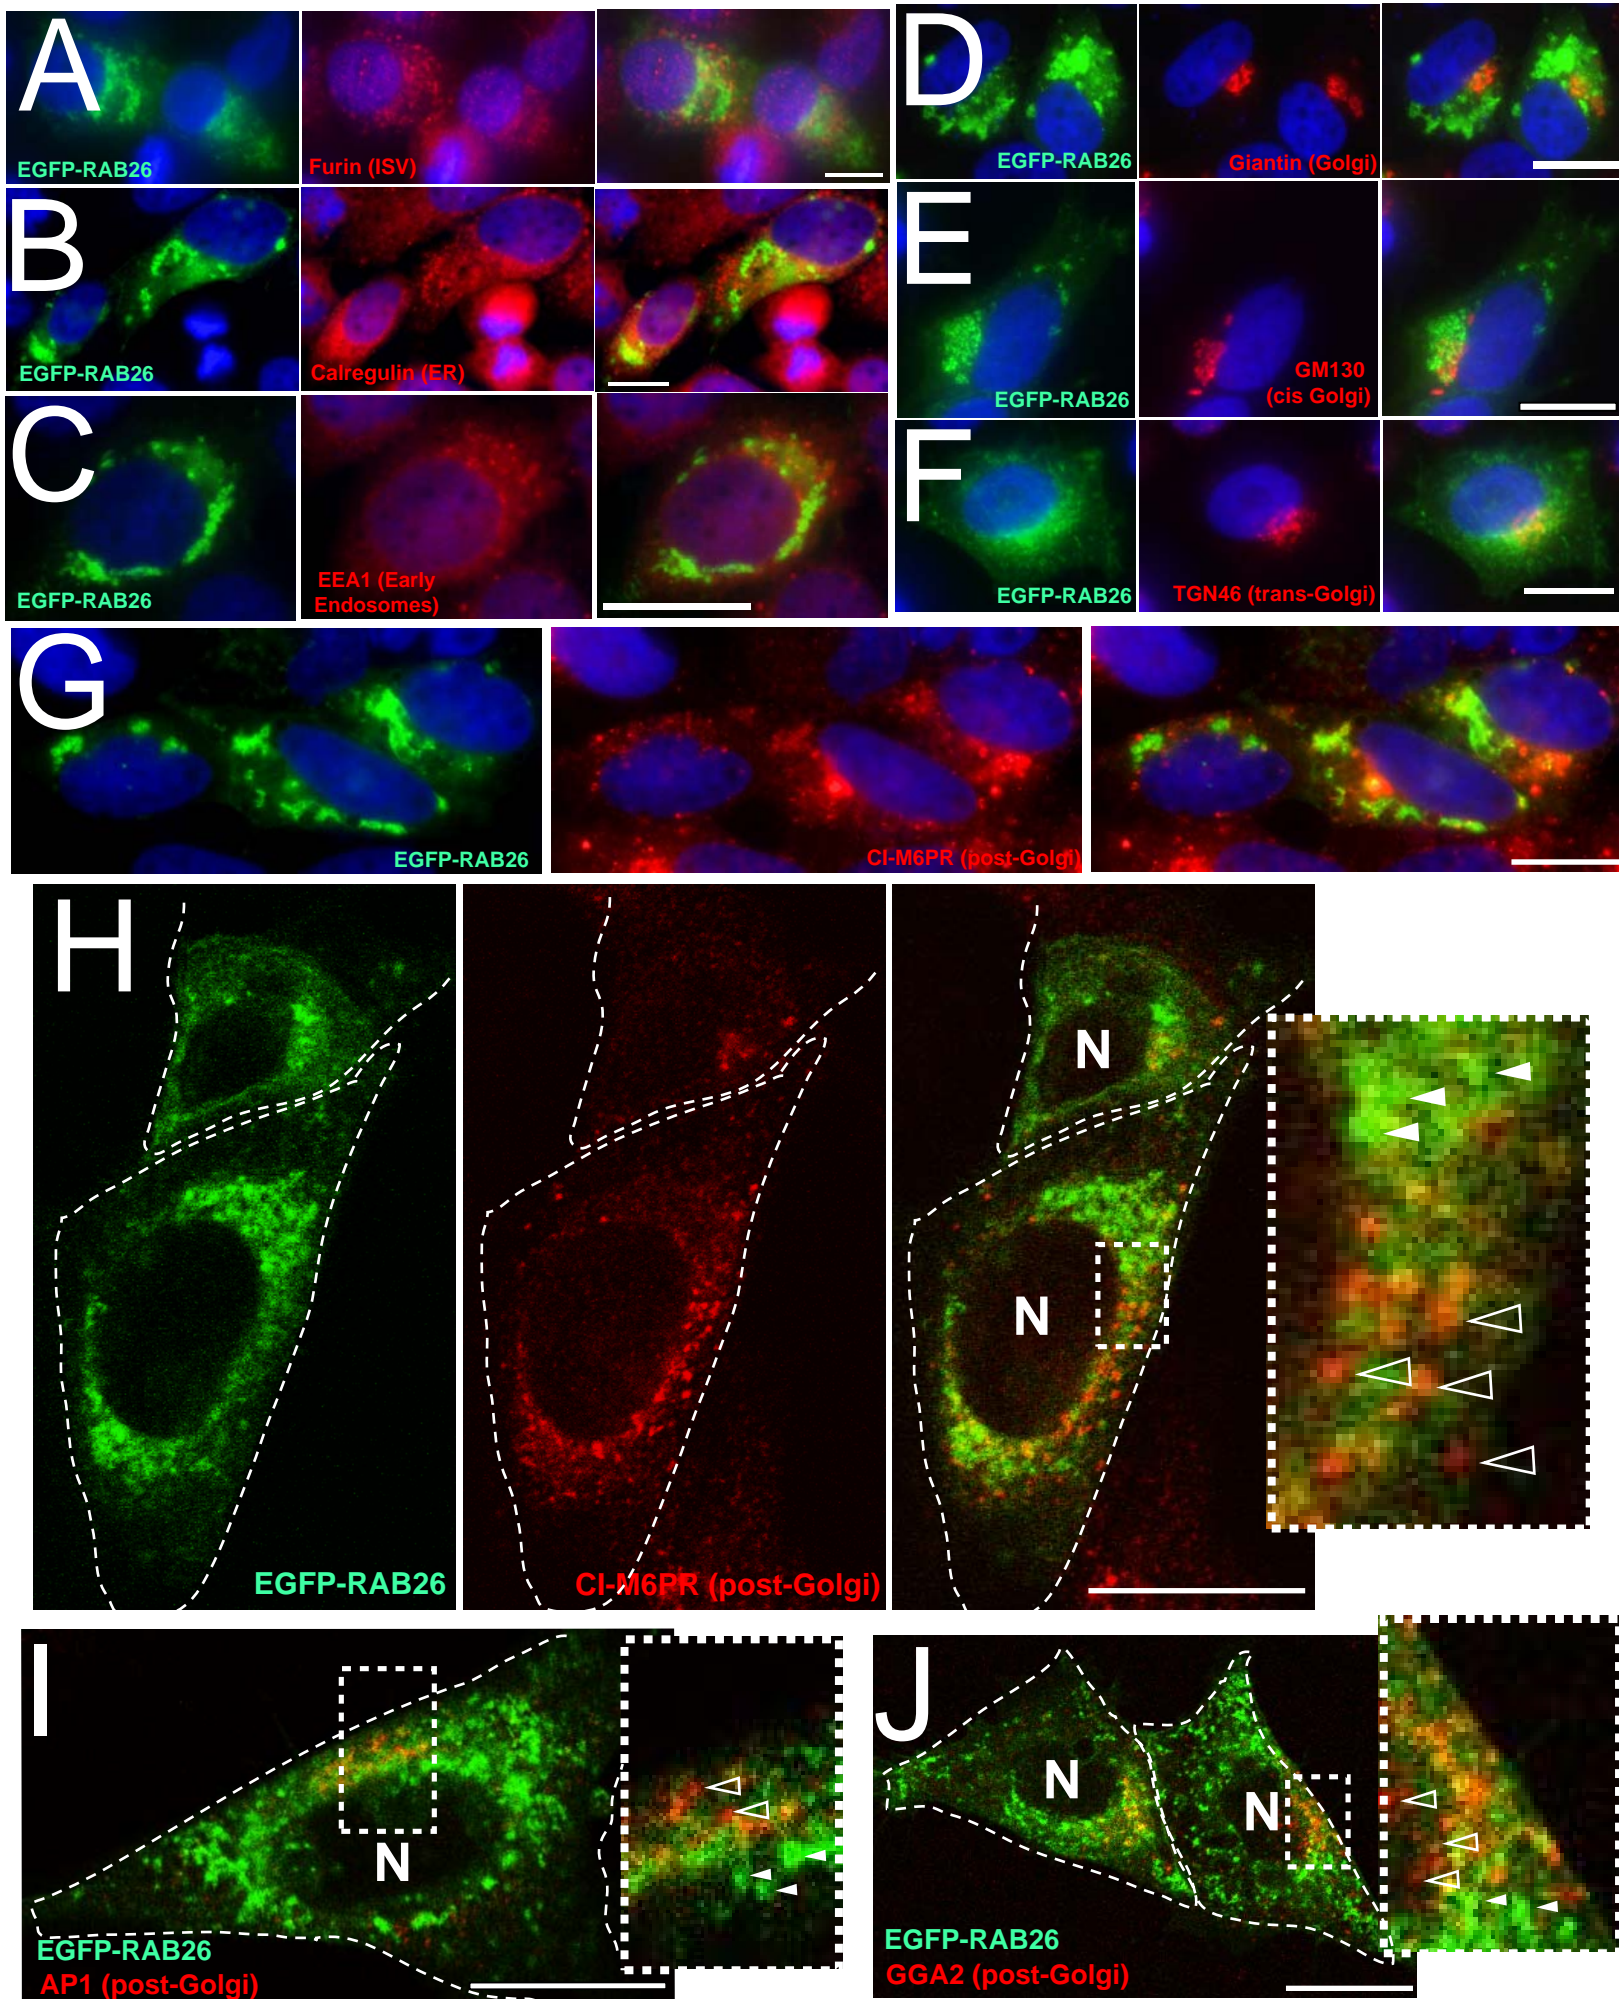



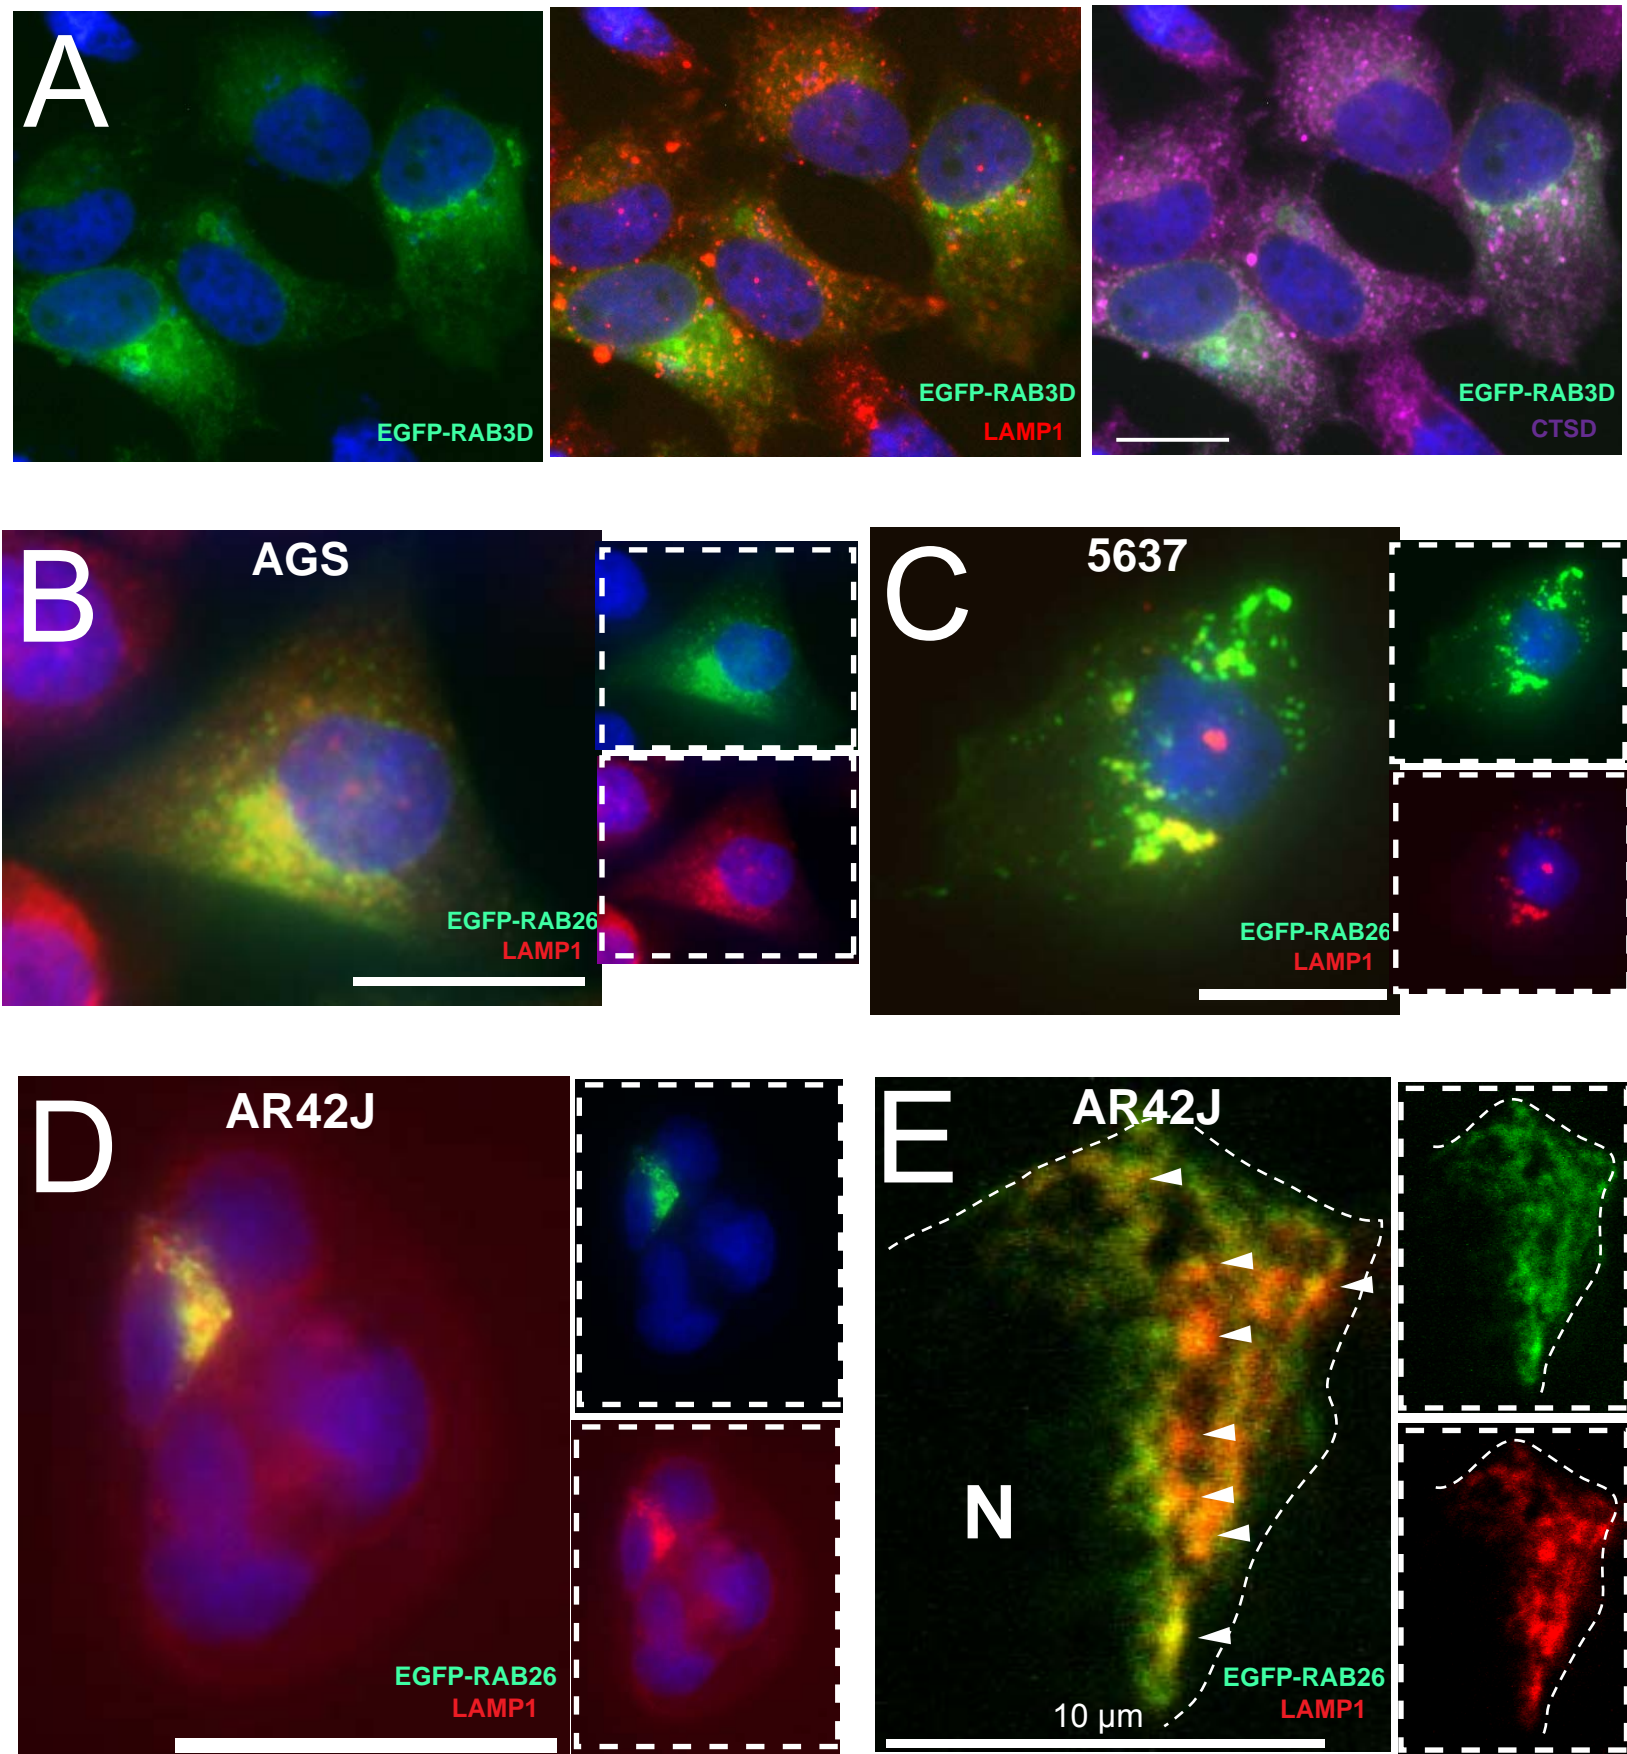

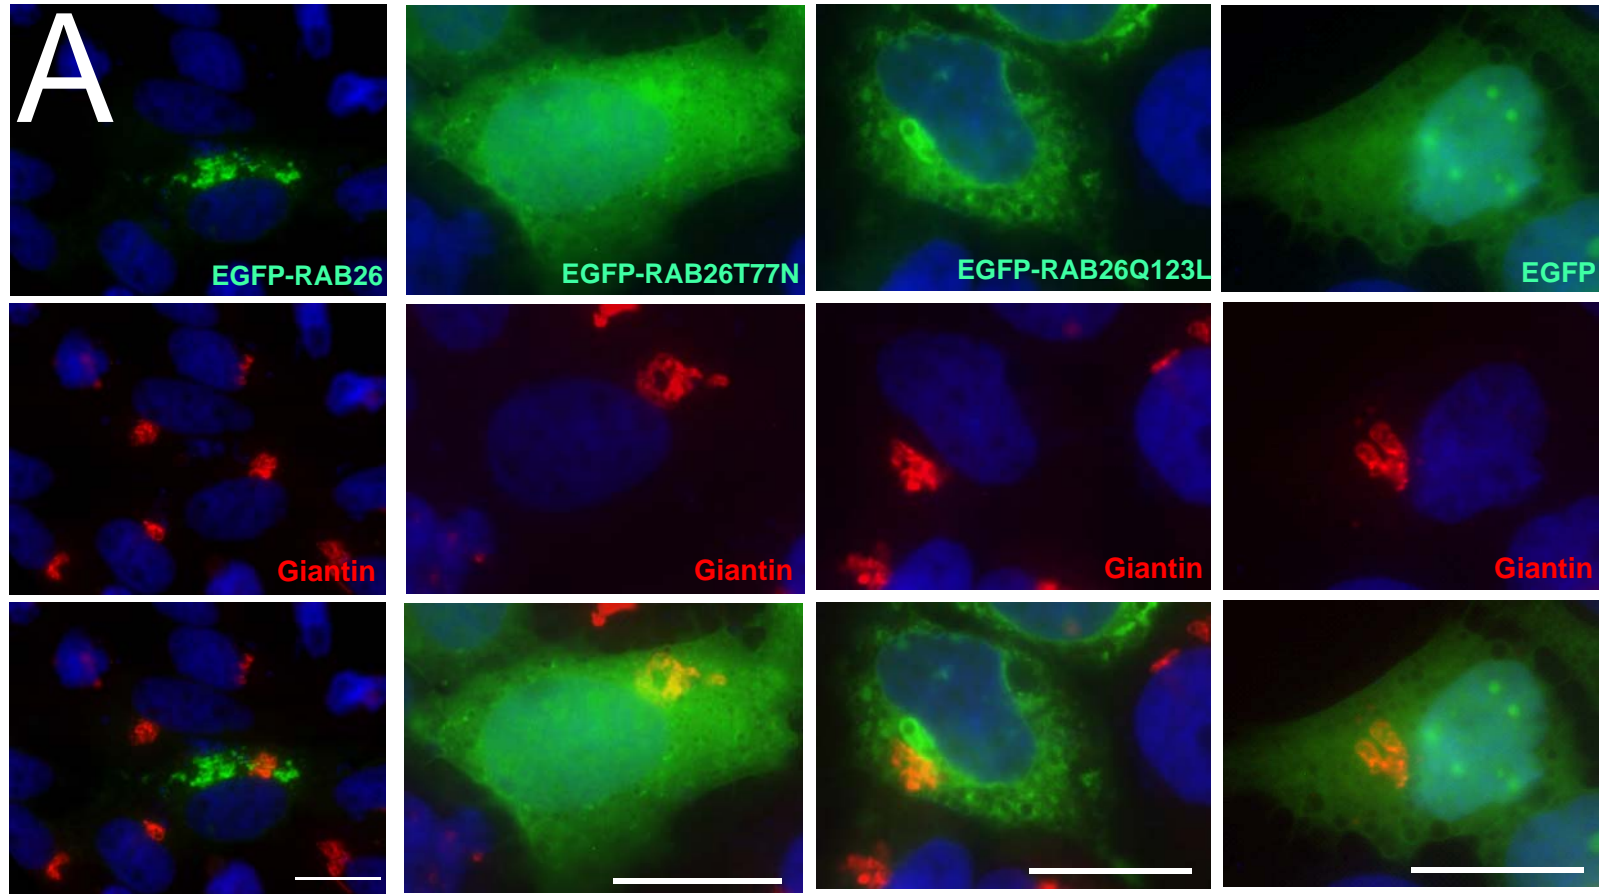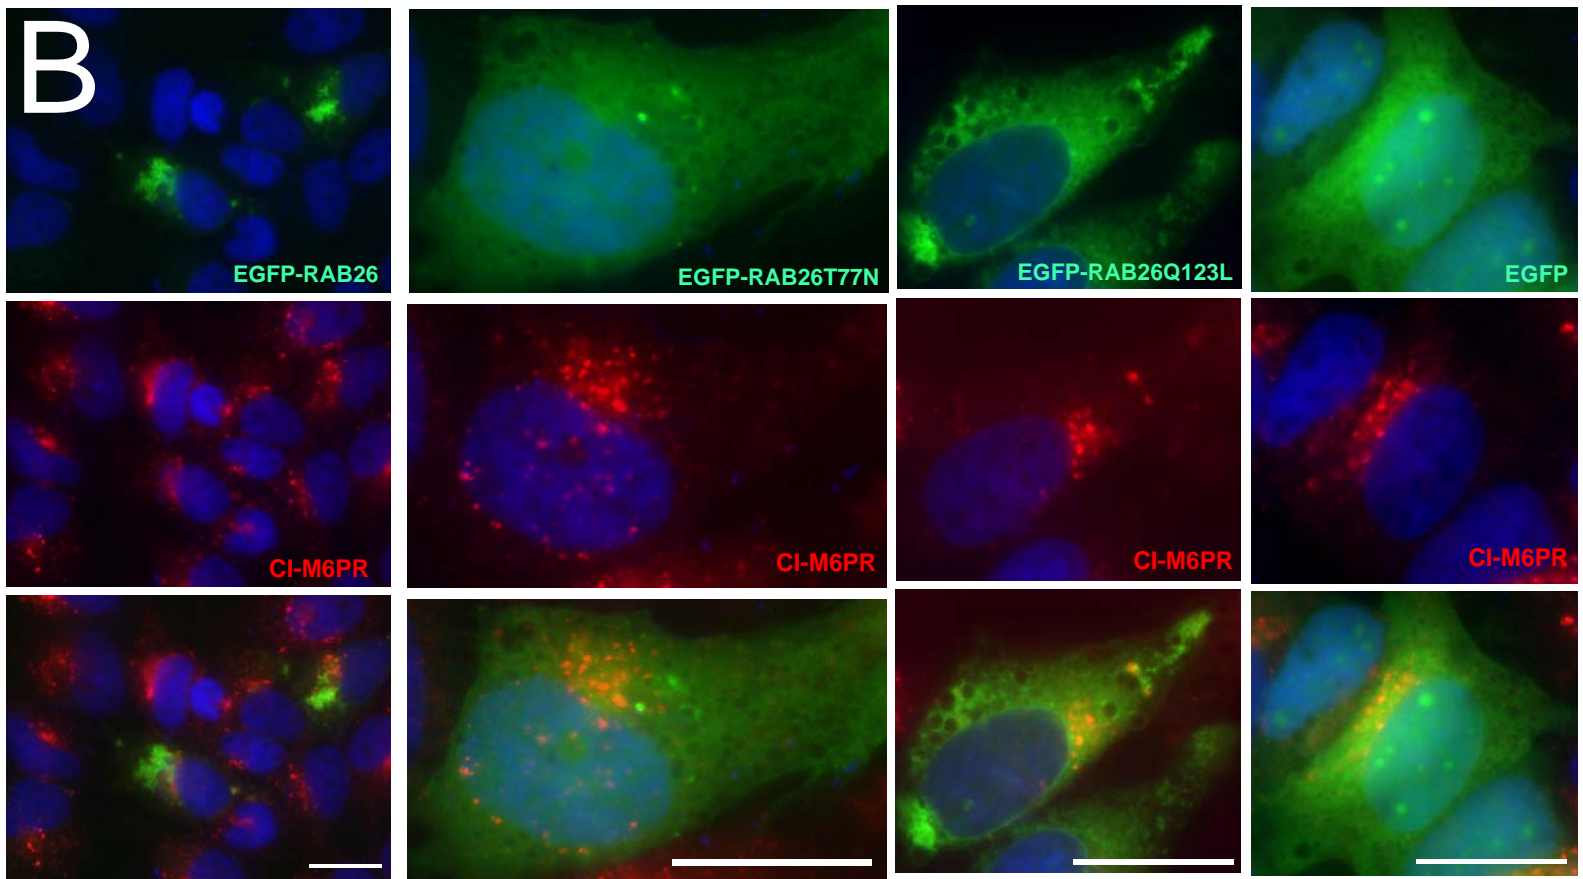



**A**

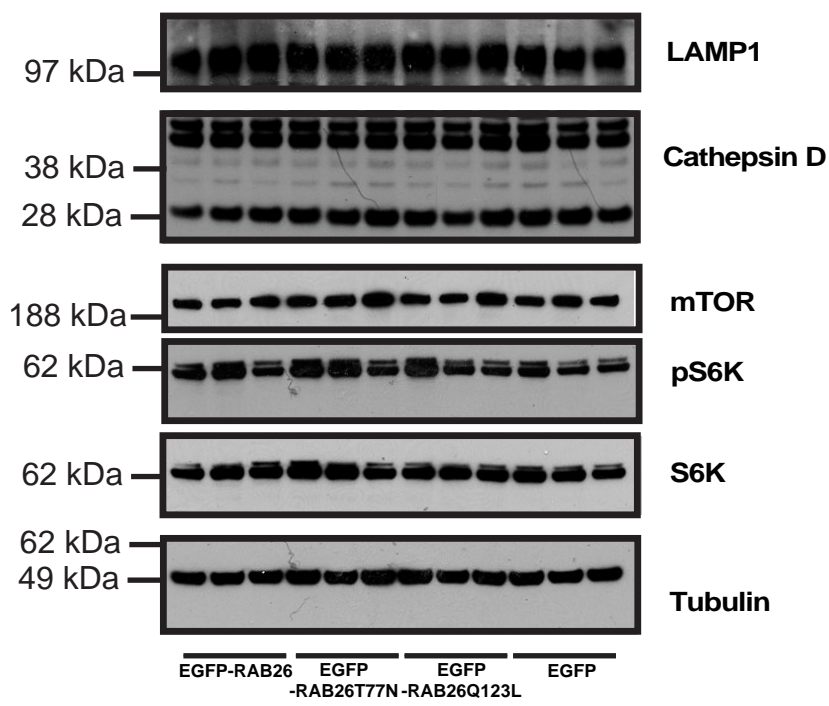

**B**

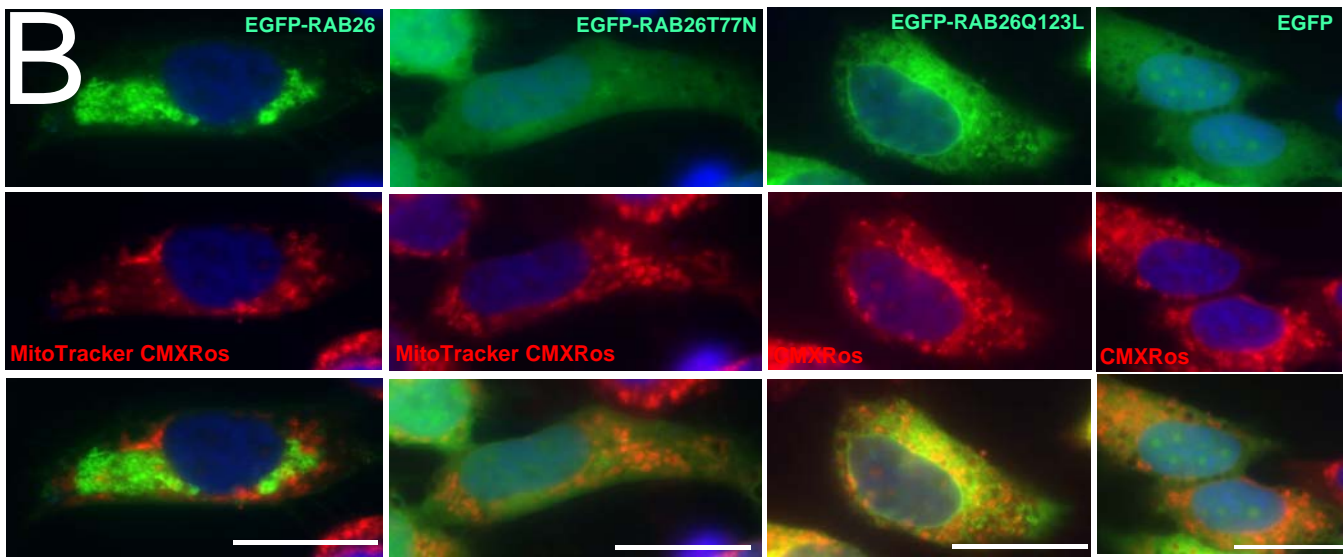

**C**

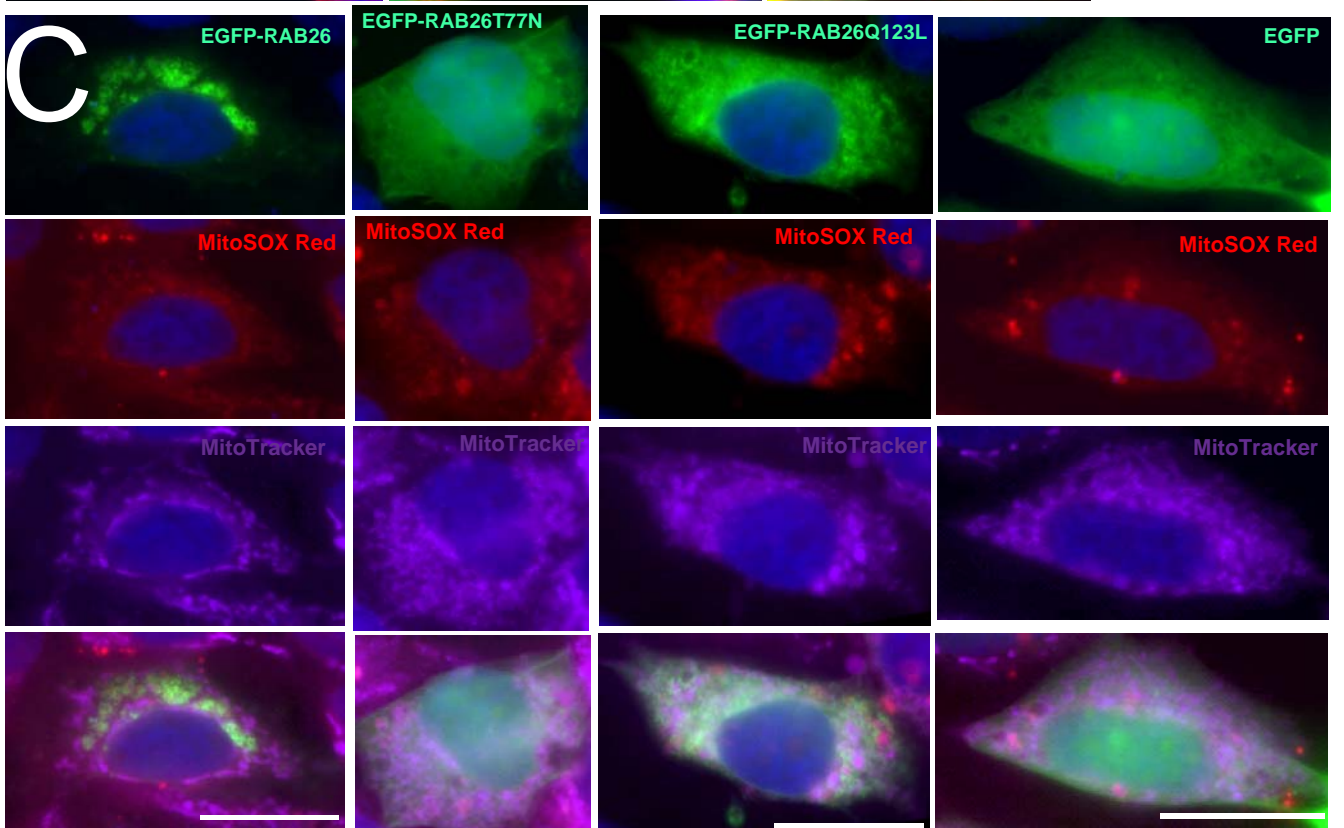

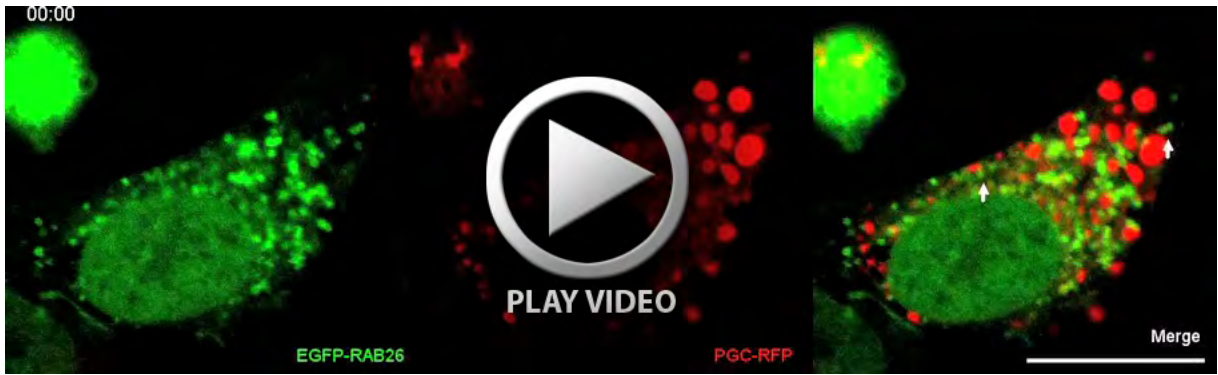

Movie 1.

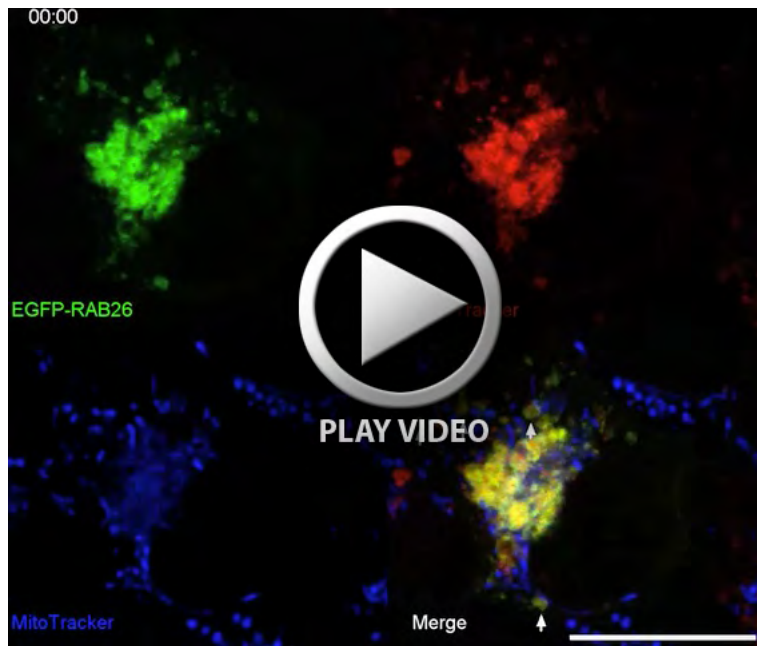

Movie 2.
